# Supplementary material
Source: Elsevier journal article supplement (https://www.sciencedirect.com/science/article/pii/S0021755718310027)
Supplement: mmc1 [file S0021755718310027:mmc1.docx]

Tabela – Prevalência de desnutrição, risco e adequação nutricional de acordo com os índices antropométricos das crianças admitidas nos serviços de pronto socorro infantil do Distrito Federal, 2017.

| Índice  antropométrico (n) | Desnutriçãoa | Risco nutricionala | Adequação nutricionala |
| --- | --- | --- | --- |
| n (%) | n (%) | n (%) |
| P/I (271) | 6 (2,21) | 54 (19,93) | 211 (77,86) |
| E/I (271) | 11 (4,06) | 40 (14,76) | 220 (81,18) |
| P/E (210) | 16 (7,62) | 34 (16,19) | 160 (76,19) |
| IMC/I (271) | 22 (8,12) | 50 (18,45) | 199 (73,43) |
| CB/I (187) | 0 (0) | 21 (11,29) | 165 (88,71) |
| Total | 33 (12,18) | 92 (33,95) | 146 (53,87) |

P/I: peso para idade; E/I: estatura para idade; P/E: peso para estatura; IMC/I: IMC para idade; CB/I: circunferência do braço para idade; Total desnutrido: referente a todos aqueles classificados como desnutridos em qualquer um dos índices antropométricos; total em risco: referente a todos aqueles classificados como risco nutricional em qualquer um dos índices antropométricos.

a Pontos de corte: desnutrido (Z-score < -2), risco nutricional (-2 ≤ Z-score < -1) e adequado (Z-score ≥ -1).
